# Infrequent Reinfection after Successful Treatment for Hepatitis C Virus Infection in Injection Drug Users

Markus Backmund,<sup>1</sup> Kirsten Meyer,<sup>1</sup> and Brian R. Edlin<sup>2</sup>

<sup>1</sup>Department of Addiction Medicine, General Hospital Munich-Schwabing, Munich, Germany; and <sup>2</sup>Center for the Study of Hepatitis C, Weill Medical College of Cornell University, New York, New York

**We followed-up 18 injection drug users for a mean of 33.8 months (range, 4–55 months) after successful treatment for hepatitis C virus (HCV) infection. Fifteen (83%) of the patients remained HCV RNA–negative, 1 patient was not tested, and 2 patients had test results positive for HCV RNA. The estimated rate of reinfection as a result of injection drug use was 0–4.1 cases per 100 person-years (cumulative incidence, 0%–12.6% at 48 months after completion of treatment). Of 50 patients originally treated, 15 (30%) were HCV RNA–negative 3 years later.**

Injection drug users (IDUs) constitute the largest group of persons infected with the hepatitis C virus (HCV) in the United States and Europe, and most HCV transmission occurs among IDUs [1–7]. Controlling hepatitis C, therefore, will require prevention and treatment strategies that will be effective for persons who inject drugs [8–10]. Until 2002, treatment for HCV infection was not recommended for patients who were injecting illegal drugs [11, 12], on the grounds that adherence to therapy would likely be poor and the risk of reinfection would be high if they continued to inject drugs. Since 1997, knowledge of hepatitis C has increased dramatically, leading to the need to reexamine approaches to management and treatment [13].

Several studies in the United States and Europe have now shown that treatment of chronic HCV infection in IDUs is effective, with sustained virologic response (SVR) rates of 28%–36% [14–19]. In our own earlier study [14], performed in Munich, 50 IDUs began HCV treatment during opiate detoxification; the SVR rate was 36% overall and 53% among patients

who relapsed to using opiates and began methadone maintenance therapy while receiving treatment for HCV infection. The success rate of detoxification treatment among patients who were treated with IFN was similar to that among other patients [20].

Nonetheless, reinfection can occur after successful completion of treatment for HCV infection [21–23]. Little is known, however, about the incidence of reinfection among IDUs who have undergone successful treatment for HCV infection. A Scandinavian study [24] reported 5-year follow-up of 27 IDUs who had cleared HCV RNA from the blood after receiving IFN therapy. Nine patients (33%) relapsed to injection drug use, but only 1 patient became reinfected during a total of 40 person-years of observation. In this study, we present data on the 3-year follow-up of the 18 patients (36%) from our earlier study [14] who attained SVR after starting treatment for HCV infection during opiate detoxification.

**Patients and methods.** In 1997, we began a prospective study to investigate whether opiate-dependent IDUs with chronic HCV infection could be treated successfully with IFN. Fifty inpatients were enrolled in the study during detoxification treatment. All patients were taught how to avoid bloodborne infections in case they returned to using injection drugs. Patients received IFN  $\alpha$ -2a monotherapy for 48 weeks (through 1998) or IFN  $\alpha$ -2a and ribavirin for 24–48 weeks, according to HCV genotype (starting in 1998). SVR was defined by a test result negative for plasma HCV RNA at 24 weeks after the end of treatment. Eighteen patients (36%) achieved SVR [14] and were included in the present study. Patients were seen at follow-up intervals of  $\sim$ 1 year. They were asked by their physician about the use of drugs by injection and of syringes that had previously been used by another person. Plasma samples were tested for HCV RNA by PCR (Cobas Amplicor Hepatitis C Virus Test, version 2.0; Roche Diagnostics). If a test result was positive for HCV RNA, the HCV genotype was determined. The rate of reinfection was estimated using person-time methods, starting from the date of the HCV RNA test with a negative result (performed 24 weeks after the end of treatment) and assuming that reinfection occurred midway between the date of the last negative test result and the date of the first test result positive for HCV RNA. Kaplan-Meier survival methods were used to estimate the cumulative probability of reinfection after 48 months of follow-up.

**Results.** The median age of the 18 patients was 32.1 years (range, 20–40 years); 11 (61%) of the patients were men, and 7 (39%) were women. The patients were followed-up for 10–

Received 11 April 2004; accepted 7 July 2004; electronically published 26 October 2004.  
Reprints or correspondence: Dr. Brian R. Edlin, Center for the Study of Hepatitis C, Weill Medical College of Cornell University, 411 E. 69th St., Rm. KB-322, New York, NY 10021 (bre2002@med.cornell.edu).

**Clinical Infectious Diseases** 2004;39:1540–3

© 2004 by the Infectious Diseases Society of America. All rights reserved.  
1058-4838/2004/3910-0024\$15.00

61 months (mean, 39.8 months) after completing treatment or for 4–55 months (mean, 33.8 months) after achieving SVR (table 1). Fifteen patients (83%; 9 men and 6 women) remained HCV RNA–negative. One patient died of an overdose before follow-up testing for HCV RNA was performed. Two patients tested positive for HCV-RNA. Patient 42, the only patient infected with HCV genotype 1b, was found to be positive for HCV RNA 4 months after attaining SVR and again had infection with HCV genotype 1b. Patient 31, who had been infected with HCV genotype 3a, developed infection with HCV genotype 1a after a needlestick injury sustained as a health care worker 42 months after achieving SVR. She denied any illicit drug use since receiving treatment for HCV infection. Both patients remained persistently HCV RNA–positive for  $\geq 6$  months on follow-up testing. Overall, of the 50 patients originally treated, 15 (30%) were alive and HCV RNA–negative 3 years after completing treatment.

We do not know whether patient 42 had a late viral relapse or became reinfected through continued injection drug use, nor do we know whether patient 31 became reinfected through undisclosed injection drug use or through her occupational injury. The number of reinfections attributable to injection drug use, therefore, was estimated to be 0–2. The estimated rate of reinfection due to injection drug use among the 18 patients was 0–4.1 cases per 100 person-years (95% CI, 0.5–

14.9). The estimated cumulative incidence of reinfection 48 months after SVR was 0%–12.6% (95% CI, 3.3%–41.9%) (figure 1).

Of the 18 patients, 9 (50%) injected illicit drugs during the follow-up period (table 1). The number of times they injected drugs during follow-up ranged from  $<10$  (for 2 patients) to  $>100$  (for 2 patients). None reported using syringes previously used by another person. Eight patients—1 of whom (patient 27) occasionally injected heroin during the follow-up period—are living drug-free at the time of writing, with neither methadone nor heroin dependence. One patient (patient 18) was readmitted to a detoxification unit after having experienced a relapse of injection drug use and is now in an inpatient abstinence-oriented drug treatment program. Of the 7 patients being treated with methadone, 5 also use heroin at least occasionally.

**Discussion.** The possibility of reinfection has been cited by the National Institutes of Health (NIH) [10] and the European Association for the Study of the Liver [11] as a reason not to administer therapy for HCV infection to active IDUs. We followed-up 18 active IDUs who were successfully treated for HCV infection, 9 of whom injected drugs during the follow-up period. No more than 2 (and possibly as few as none) of the patients became reinfected as a result of illicit injection drug use after treatment for HCV infection. Patient 42 might have

**Table 1. Follow-up of 18 injection drug users with sustained virologic response (SVR) after treatment for hepatitis C virus (HCV) infection.**

| Patient | HCV genotype | Follow-up period, months after SVR | HCV RNA test result (genotype) | Any injection drug use during follow-up? | Current injection drug use status         |
|---------|--------------|------------------------------------|--------------------------------|------------------------------------------|-------------------------------------------|
| 1       | 3a           | 9                                  | Negative                       | No                                       | Receiving methadone treatment             |
| 3       | 1a           | 41                                 | Negative                       | No                                       | Receiving methadone treatment             |
| 5       | 3a           | 33                                 | Negative                       | No                                       | Drug free                                 |
| 7       | 1a           | 27                                 | Negative                       | Yes                                      | Receiving methadone treatment             |
| 10      | 3a           | 55                                 | Negative                       | Yes                                      | Receiving methadone treatment             |
| 12      | 1a           | 54                                 | Negative                       | Yes                                      | Receiving methadone treatment             |
| 18      | 3a           | 43                                 | Negative                       | Yes                                      | Enrolled in residential treatment program |
| 21      | 3a           | 50                                 | Negative                       | Yes                                      | Receiving methadone treatment             |
| 26      | 1a           | 45                                 | Negative                       | No                                       | Drug free                                 |
| 27      | 3a           | 38                                 | Negative                       | Yes                                      | Drug free                                 |
| 30      | 3a           | 8                                  | Negative                       | Yes                                      | Receiving no treatment                    |
| 31      | 3a           | 42                                 | Positive (1a)                  | No                                       | Drug free                                 |
| 33      | 3a           | 21                                 | Negative                       | No                                       | Drug free                                 |
| 35      | 3a           | 46                                 | Negative                       | No                                       | Drug free                                 |
| 42      | 1b           | 4                                  | Positive (1b)                  | Yes                                      | Receiving methadone treatment             |
| 46      | 1a           | 6                                  | ND                             | Yes                                      | Deceased <sup>a</sup>                     |
| 49      | 3a           | 40                                 | Negative                       | Unknown                                  | Drug free                                 |
| 50      | 1a           | 47                                 | Negative                       | No                                       | Drug free                                 |

**NOTE.** Patients are derived from the cohort described in [14]. SVR was defined by a test result negative for plasma HCV RNA at 24 weeks after the end of treatment for HCV infection. ND, not done.

<sup>a</sup> Patient 46 died of a drug overdose.

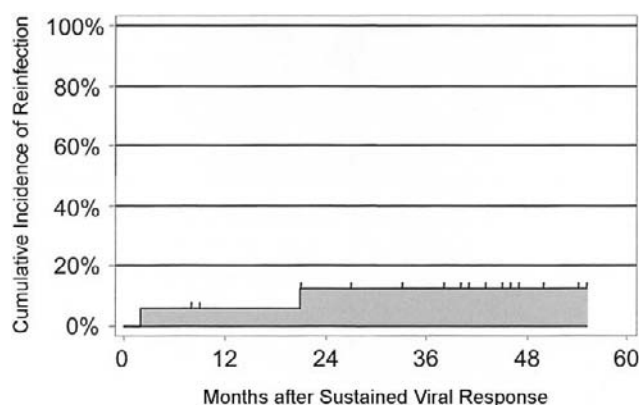

**Figure 1.** Estimated cumulative incidence of reinfection due to recurrent injection drug use after successful treatment for HCV infection among 18 injection drug users (*shaded area*). Kaplan-Meier plot shows the maximum estimated incidence. Estimated cumulative incidence at 48 months after achievement at sustained viral response was 0%–12.6% (95% CI, 3.3%–41.9%). Sustained virologic response was defined by a test result negative for plasma HCV RNA at 24 weeks after the end of treatment for HCV infection.

become reinfected, but the virus appeared only 4 months after SVR and had the same genotype as the virus responsible for the previous infection (genotype 1b, which was uncommon in our population). Late relapse may occur in 4%–10% of patients with SVR [25–27]. Patient 31 reported an occupational needle stick injury and denied any illicit drug use during the 4 years since being treated for HCV infection. Although we could not document the truthfulness of her report, we have no reason to suspect that she had used injection drugs. She had worked stably and productively as a nurse for 4 years. The genotype of the virus responsible for her second infection (1a) is uncommon among IDUs in Munich but is common among other individuals with HCV infection [8, 28–30]. Thus, we estimate that the rate of reinfection among our patients was between 0–4.1 cases per 100 person-years. These findings are consistent with a Norwegian study [24] that found a reinfection rate of 2.5 cases per 100 person-years among former IDUs (1 case of reinfection in 40 person-years of follow-up).

During treatment, the patients in our study were taught how to avoid bloodborne infections, in case they returned to using injection drugs. Addiction is a chronic, relapsing condition. Most patients entering treatment do not immediately and permanently stop using injection drugs. Relapse must be anticipated and should be planned for. Drug users may avoid acquiring and transmitting bloodborne infections when they inject drugs by using sterile injection equipment and safe injection techniques [31]. Physicians can help IDUs to avoid acquiring HCV infection and to avoid reacquiring it after successful treatment for HCV infection by helping them to un-

derstand safe injection techniques and to gain access to sterile syringes [13].

One of our patients died as the result of a drug overdose. In Germany, the mortality rate among IDUs in the first year after completion of detoxification treatment is 2.8%–10% [32, 33]. During methadone maintenance therapy, the mortality rate is 1.4%–2.7%, and treatment with higher doses of methadone seems to be protective [34, 35]. Among our patients who were successfully treated for HCV infection during the first year after detoxification, the mortality was 5.5% (95% CI, 0.1%–27.3%). These data underscore the importance of overdose prevention, which is always a critical component of the care of current and former IDUs [36, 37].

In conclusion, our data suggest that IDUs can be reinfected after treatment for HCV infection, but the reinfection rate is not so high as to jeopardize the potential benefit for most patients. Overall, 15 (30%) of the 50 IDUs we originally treated for HCV infection remained alive and HCV RNA–negative 3 years after the end of treatment. Our sample population was small; further studies with larger numbers of patients are needed. In the meantime, however, it appears that therapy for HCV infection is successful in a substantial proportion of IDUs [14–19], and reinfection appears to be uncommon, even among those who inject drugs after achieving SVR. Thus, therapy for HCV infection should not be categorically withheld from IDUs [9]. The new NIH recommendations of 2002 reflect this new standard [13]. In our experience, the best approach for treatment of HCV infection in IDUs has been to start treatment during detoxification or methadone maintenance, with supervision by physicians specialized in both hepatology and addiction medicine.

## Acknowledgment

**Potential conflicts of interest.** All authors: No conflict.

## References

1. Crofts N, Nigro L, Oman K, Stevenson E, Sherman J. Methadone maintenance and hepatitis C virus infection among injecting drug users. *Addiction* **1997**;92:999–1005.
2. Diamantis I, Bassetti S, Erb P, Ladewig D, Gyr K, Battegay M. High prevalence and coinfection rate of hepatitis G and C infections in intravenous drug addicts. *J Hepatol* **1997**;26:794–7.
3. Galeazzi B, Tufano A, Barbierato E, Bortolotti F. Hepatitis C virus infection in Italian intravenous drug users: epidemiological and clinical aspects. *Liver* **1995**;15:209–12.
4. Thomas DL, Vlahov D, Solomon L, et al. Correlates of hepatitis C virus infections among injection drug users. *Medicine (Baltimore)* **1995**;74:212–20.
5. Lorvick J, Kral AH, Seal KH, Gee L, Edlin BR. Prevalence and duration of hepatitis C among injection drug users in San Francisco, Calif. *Am J Public Health* **2001**;91:46–7.
6. Backmund M, Meyer K, von Zielonka M. Prävalenzdaten zu Hepatitis B und C bei Drogenabhängigen in München. *Suchtmed* **2001**;3:21–4.
7. Backmund M, Meyer K, Waechter M, Eichenlaub D. Hepatitis C virus

- infection in injection drug users in Bavaria: risk factors for seropositivity. *Eur J Epidemiol* **2003**;18:563–8.
8. Alter MJ, Moyer LA. The importance of preventing hepatitis C virus infection among injection drug users in the United States. *J Acquir Immune Defic Syndr Hum Retrovirol* **1998**;18(Suppl 1):S6–10.
  9. Edlin BR, Seal KH, Lorvick J, et al. Is it justifiable to withhold treatment for hepatitis C from illicit-drug users? *N Engl J Med* **2001**;345:211–4.
  10. Edlin BR. Hepatitis C prevention and treatment for injection drug users. *Hepatology* **2002**;36 (Suppl 1):S210–9.
  11. National Institutes of Health. National Institutes of Health consensus development conference panel statement: management of hepatitis C. *Hepatology* **1997**;26:71S–77S.
  12. EASL International Consensus Conference on Hepatitis C: consensus statement. *J Hepatol* **1999**;30:956–61.
  13. National Institutes of Health. National Institutes of Health consensus development conference statement: management of hepatitis C, 2002. *Hepatology* **2002**;36:S3–20.
  14. Backmund M, Meyer K, von Zielonka M, Eichenlaub D. Treatment of hepatitis C infection in injection drug users. *Hepatology* **2001**;34:188–93.
  15. Sylvestre DL. Treating hepatitis C in methadone maintenance patients: an interim analysis. *Drug Alcohol Depend* **2002**;67:117–23.
  16. Sylvestre DL. Treatment of HCV in the methadone patient. In: Comorbid conditions associated with hepatitis C. Alexandria, VA: American Association for the Study of Liver Diseases, **2002**:103–7.
  17. Schaefer M, Schmidt F, Folwaczny C, et al. Adherence and mental side effects during hepatitis C treatment with interferon  $\alpha$  and ribavirin in psychiatric risk groups. *Hepatology* **2003**;37:443–51.
  18. Neri S, Bruno CM, Abate G, et al. Controlled clinical trial to assess the response of recent heroin abusers with chronic hepatitis C virus infection to treatment with interferon alpha-n2b. *Clin Ther* **2002**;24:1627–35.
  19. Van Thiel DH, Anantharaju A, Creech S. Response to treatment of hepatitis C in individuals with a recent history of intravenous drug abuse. *Am J Gastroenterol* **2003**;98:2281–8.
  20. Backmund M. Interferonbehandlung während der Entzugsbehandlung. *Suchttherapie* **2002**;3(Suppl 1):S67–71.
  21. Kao JH, Lai MY, Chen PJ, Chen DS. Probably reinfection with hepatitis C virus in a chronic hepatitis C patient with a sustained response to combination therapy. *J Formos Med Assoc* **2001**;100:824–8.
  22. de Mitri MS, Cassini R, Morsica G, Bagaglio S, Zoli M, Bernardi M. New infection with heterotypic hepatitis C virus in a patient with long-term hepatitis C virus eradication. *Dig Liver Dis* **2001**;33:591–4.
  23. Asselah T, Vidaud D, Doloy A, et al. Second infection with a different hepatitis C virus genotype intravenous drug user during interferon therapy. *Gut* **2003**;52:900–2.
  24. Dalgard O, Bjoro K, Hellum K, et al. Treatment of chronic hepatitis C in injecting drug users: 5 years' follow-up. *Eur Addict Res* **2002**;8:45–9.
  25. Marcellin P, Boyer N, Giostra E, et al. Recombinant human  $\alpha$ -interferon in patients with chronic non-A, non-B hepatitis: a multicenter randomized controlled trial from France. *Hepatology* **1991**;13:393–7.
  26. Reichard O, Glaumann H, Fryden A, Norkans G, Wejstal R, Weiland O. Long-term follow-up of chronic hepatitis C patients with sustained virological response to alpha-interferon. *J Hepatol* **1999**;30:783–7.
  27. Camma C, Di Marco V, Lo Iacono O, et al. Long-term course of interferon-treated chronic hepatitis C. *J Hepatol* **1998**;28:531–7.
  28. Findor JA, Sorda JA, Daruich J, et al. Distribution of the genotypes of hepatitis C virus infection in intravenous drug addicts in Argentina. *Medicina (B Aires)* **1999**;59:49–54.
  29. Vince A, Palmovic D, Kutela N, Sonicky Z, Jeren T, Radovani M. HCV Genotypes in patients with chronic hepatitis C in Croatia. *Infection* **1998**;3:173–7.
  30. Freeman AJ, Zekry A, Whybin LR, et al. Hepatitis C prevalence among Australian injecting drug users in the 1970s and profiles of virus genotypes in the 1970s and 1990s. *Med J Aust* **2000**;172:588–91.
  31. Normand J, Vlahov D, Moses L, eds. Preventing HIV transmission: the role of sterile needles and bleach. National Research Council. Institute of Medicine. Washington: National Academy Press, **1995**.
  32. Zinkler M, Valdes J, von Cranach M, Soyka M. Katamnestiche Untersuchung niedrigschwellig entgifteter Opiatabhängiger. *Sucht* **1998**;44:25–33.
  33. Küfner H, Vogt M, Weiler D. Medizinische Rehabilitation und Methadon-Substitution: Modellprojekt zur Vorbereitung und Durchführung einer ambulanten, medizinischen Rehabilitation von Drogenabhängigen. Baltmansweiler: Schneider-Verlag, **1999**.
  34. Reuter B, Küfner H. Ergebnisse der Methadonsubstitution in Deutschland: eine qualitative und quantitative Zusammenfassung. *Suchtmed* **2002**;4:31–45.
  35. Maxwell S, Shinderman MS. Optimizing long-term response to methadone maintenance treatment: a 152-week follow-up using higher-dose methadone. *J Addict Dis* **2002**;21:1–12.
  36. Seal KH, Kral AH, Gee L, et al. Predictors and prevention of nonfatal overdose among street-recruited injection heroin users in the San Francisco Bay Area, 1998–1999. *Am J Public Health* **2001**;91:1842–6.
  37. Darke S, Hall W. Heroin overdose: research and evidence-based intervention. *J Urban Health* **2003**;80:189–200.
